# Supplementary material
Source: ML conference proceedings conference paper supplement (https://proceedings.neurips.cc/paper_files/paper/2022/hash/25c5133ad2ab138f448b71b3c7345ec3-Abstract.html)
Supplement: Supplementary file 1 [file 25c5133ad2ab138f448b71b3c7345ec3-Supplemental-Conference.zip]

Archive with 58 entries (53 files):
- supplementary/
- __MACOSX/._supplementary
- supplementary/.DS_Store
- __MACOSX/supplementary/._.DS_Store
- supplementary/code/
- supplementary/bipartite_matching_degrees_full.pdf
- __MACOSX/supplementary/._bipartite_matching_degrees_full.pdf
- supplementary/code/.DS_Store
- __MACOSX/supplementary/code/._.DS_Store
- supplementary/code/analysis-experiments-asymptotic.ipynb
- __MACOSX/supplementary/code/._analysis-experiments-asymptotic.ipynb
- supplementary/code/__init__.py
- __MACOSX/supplementary/code/.___init__.py
- supplementary/code/matching.py
- __MACOSX/supplementary/code/._matching.py
- supplementary/code/analysis-experiments.ipynb
- __MACOSX/supplementary/code/._analysis-experiments.ipynb
- supplementary/code/snapshot_graphs.ipynb
- __MACOSX/supplementary/code/._snapshot_graphs.ipynb
- supplementary/code/zipf-experiments.ipynb
- __MACOSX/supplementary/code/._zipf-experiments.ipynb
- supplementary/code/README.txt
- __MACOSX/supplementary/code/._README.txt
- supplementary/code/data/
- __MACOSX/supplementary/code/._data
- supplementary/code/data/.DS_Store
- __MACOSX/supplementary/code/data/._.DS_Store
- supplementary/code/data/caida/
- __MACOSX/supplementary/code/data/._caida
- supplementary/code/data/oregon1/
- __MACOSX/supplementary/code/data/._oregon1
- supplementary/code/data/caida/as-caida20040105-dup.pkl
- supplementary/code/data/caida/as-caida20040503-dup.pkl
- supplementary/code/data/caida/as-caida20040607-dup.pkl
- supplementary/code/data/caida/.DS_Store
- __MACOSX/supplementary/code/data/caida/._.DS_Store
- supplementary/code/data/caida/as-caida20040802-dup.pkl
- supplementary/code/data/caida/as-caida20040705-dup.pkl
- supplementary/code/data/caida/as-caida20041206-dup.pkl
- supplementary/code/data/caida/as-caida20040301-dup.pkl
- supplementary/code/data/caida/as-caida20040105-dup-degrees.pkl
- supplementary/code/data/caida/as-caida20040202-dup.pkl
- supplementary/code/data/caida/as-caida20041101-dup.pkl
- supplementary/code/data/caida/as-caida20040906-dup.pkl
- supplementary/code/data/caida/as-caida20041004-dup.pkl
- supplementary/code/data/caida/as-caida20040405-dup.pkl
- supplementary/code/data/oregon1/.DS_Store
- __MACOSX/supplementary/code/data/oregon1/._.DS_Store
- supplementary/code/data/oregon1/oregon1_010512-dup.pkl
- supplementary/code/data/oregon1/oregon1_010526-dup.pkl
- supplementary/code/data/oregon1/oregon1_010519-dup.pkl
- supplementary/code/data/oregon1/oregon1_010421-dup.pkl
- supplementary/code/data/oregon1/oregon1_010407-dup.pkl
- supplementary/code/data/oregon1/oregon1_010428-dup.pkl
- supplementary/code/data/oregon1/oregon1_010505-dup.pkl
- supplementary/code/data/oregon1/oregon1_010414-dup.pkl
- supplementary/code/data/oregon1/oregon1_010331-dup-degrees.pkl
- supplementary/code/data/oregon1/oregon1_010331-dup.pkl
