# Supplementary material
Source: ML conference proceedings conference paper supplement (https://proceedings.neurips.cc/paper_files/paper/2022/hash/25c5133ad2ab138f448b71b3c7345ec3-Abstract.html)
Supplement: Supplementary file 1 [file 25c5133ad2ab138f448b71b3c7345ec3-Supplemental-Conference.zip › supplementary/code/analysis-experiments-asymptotic.ipynb]

# %% [code]
from matching import *
import numpy as np

# %% [code]
exponents = np.arange(0.5, 2.01, .5)
cutoffs = 10**np.arange(1,6)
print(exponents)
print(cutoffs)

# %% [code]
offline = np.zeros((len(exponents), len(cutoffs)))
minpreddegree = np.zeros((len(exponents), len(cutoffs)))
for i, exp in enumerate(exponents):
  for j, cutoff in enumerate(cutoffs):
    print(exp, cutoff)
    maxdeg = 10*cutoff # error < e^(-10)
    degrees = np.arange(1, maxdeg+1)
    fractions = 1 / np.arange(1, maxdeg+1)**exp * np.exp(-np.arange(1,maxdeg+1)/cutoff)
    fractions /= np.sum(fractions)
    offline[i,j] = offline_bound_expected_asymptotic(degrees, fractions, dmax=10, verbose=False)
    minpreddegree[i,j] = 1 - np.sum(simulate_diffeqs_asymptotic(degrees, fractions, verbose=False))
    print(minpreddegree[i,j]/offline[i,j])
    print()

# %% [code]
