# Supplementary material
Source: ML conference proceedings conference paper supplement (https://proceedings.neurips.cc/paper_files/paper/2022/hash/25c5133ad2ab138f448b71b3c7345ec3-Abstract.html)
Supplement: Supplementary file 1 [file 25c5133ad2ab138f448b71b3c7345ec3-Supplemental-Conference.zip › supplementary/code/analysis-experiments.ipynb]

# %% [code]
from matching import *
import numpy as np

# %% [code]
params = [0.6, 0.8, 1, 1.2, 1.4]
sizes = [10, 20, 50, 100, 200, 500, 1000,2000,5000,10000,20000,50000,int(1e5),int(2e5),int(5e5),int(1e6)]
print(params)
print(sizes)

# %% [code]
offline = np.zeros((len(sizes), len(params)))
minpreddegree = np.zeros((len(sizes), len(params)))
for i, n in enumerate(sizes):
  for j, param in enumerate(params):
    degrees_u = (n/2) / np.arange(1,n+1)**param
    degrees_u = np.sort(degrees_u)
    offline_prediction = offline_bound_expected(n, n, degrees_u, verbose=False)
    predprocess = simulate_diffeqs(n, n, degrees_u, verbose=False)
    mpd_prediction = n - np.sum(predprocess)
    offline[i, j] = offline_prediction
    minpreddegree[i, j] = mpd_prediction
    print('Size, Param: {}, {}'.format(n, param))
    print('minpreddegree, offline, ratio: {:2f}, {:2f}, {:2f}'.format(minpreddegree[i,j], offline[i,j], minpreddegree[i,j]/offline[i,j]))
    print()

# %% [code]
