# Supplementary material
Source: ML conference proceedings conference paper supplement (https://proceedings.neurips.cc/paper_files/paper/2022/hash/25c5133ad2ab138f448b71b3c7345ec3-Abstract.html)
Supplement: Supplementary file 1 [file 25c5133ad2ab138f448b71b3c7345ec3-Supplemental-Conference.zip › supplementary/code/snapshot_graphs.ipynb]

# %% [code]
from matching import *
import os
import networkx as nx
import pickle as pkl
import numpy as np

# %% [code]
n_repeat = 100
dataset = 'caida'

# %% [code]
if dataset == 'oregon':
  foracle = 'data/oregon1/oregon1_010331-dup-degrees.pkl'
  path = 'data/oregon1/'
elif dataset == 'caida':
  year = '2004'
  foracle = 'data/caida/as-caida20040105-dup-degrees.pkl'
  path = 'data/caida/'

# %% [code]
dist_type = 'import'
graph_type = 'n/a'
with open(foracle, 'rb') as f:
    oracle_dict = pkl.load(f)

# %% [code]
from os import listdir
from os.path import isfile, join
all_files = sorted([f for f in listdir(path) if isfile(join(path, f))])
if dataset == 'oregon':
  files = [path+file for file in all_files if file[15:18] == 'dup' and len(file) == 22] #oregon
elif dataset == 'caida':
  files = [path+file for file in all_files if file[8:12] == year and file[17:20] == 'dup' and len(file) == 24] #caida
print(len(files))
print(files)

# %% [code]
minpreddegree = np.zeros((len(files), n_repeat))
ranking = np.zeros((len(files), n_repeat))
mindegree = np.zeros((len(files), n_repeat))
offline = np.zeros((len(files), n_repeat))
for i, file in enumerate(files):
  if i % 1 == 0:
    print(i)
  for t in range(n_repeat):
    G = nx.read_gpickle(file)
    dist_param = G
    U, V = get_bipartition(G)
    n_u = len(U)
    n_v = len(V)
    perm = np.arange(n_v)
    np.random.shuffle(perm)

    G, degrees_u = build_graph(n_u, n_v, dist_param, verbose=False, dist_type=dist_type, graph_type=graph_type)
    matchings = single_run(G, degrees_u, perm=perm, oracle_dict=oracle_dict)
    
    md_size = get_matching_size(matchings['static_degrees_matching'])
    mpd_size = get_matching_size(matchings['static_oracle_dict_matching'])
    ranking_size = get_matching_size(matchings['ranking_matching'])
    offline_size = get_matching_size(matchings['offline_matching'])
    
    offline[i,t] = offline_size
    ranking[i,t] = ranking_size
    minpreddegree[i,t] = mpd_size
    mindegree[i,t] = md_size

# %% [code]
print(np.mean(ranking/offline, axis=1))
print(np.mean(minpreddegree/offline, axis=1))
print(np.mean(mindegree/offline, axis=1))

# %% [code]
