# Supplementary material
Source: ML conference proceedings conference paper supplement (https://proceedings.neurips.cc/paper_files/paper/2022/hash/25c5133ad2ab138f448b71b3c7345ec3-Abstract.html)
Supplement: Supplementary file 1 [file 25c5133ad2ab138f448b71b3c7345ec3-Supplemental-Conference.zip › supplementary/code/zipf-experiments.ipynb]

# %% [code]
from matching import *
import numpy as np

# %% [code]
n_repeat = 100
params = np.arange(0.2,2.01,0.1)
print(params)

# %% [code]
minpreddegree = np.zeros((len(params), n_repeat))
ranking = np.zeros((len(params), n_repeat))
mindegree = np.zeros((len(params), n_repeat))
offline = np.zeros((len(params), n_repeat))
for i, param in enumerate(params):
  if i % 1 == 0:
    print(i)
  for t in range(n_repeat):
    n_u = 1000
    n_v = 1000
    dist_type = 'zipf-linguist'
    dist_param = param
    graph_type = 'expected'
    oracle_dict = None
    perm = np.arange(n_v)

    G, degrees_u = build_graph(n_u, n_v, dist_param, verbose=False, dist_type=dist_type, graph_type=graph_type)
    matchings = single_run(G, degrees_u, perm=perm, oracle_dict=oracle_dict)
    
    mpd_size = get_matching_size(matchings['static_degrees_matching'])
    ranking_size = get_matching_size(matchings['ranking_matching'])
    offline_size = get_matching_size(matchings['offline_matching'])
    U, V = get_bipartition(G, perm=perm)
    true_degrees = np.array([G.degree[u] for u in U])
    md_size = get_matching_size(static_degrees(G, true_degrees, perm=perm))

    offline[i,t] = offline_size
    ranking[i,t] = ranking_size
    minpreddegree[i,t] = mpd_size
    mindegree[i,t] = md_size

# %% [code]
print(np.mean(ranking/offline, axis=1))
print(np.mean(minpreddegree/offline, axis=1))
print(np.mean(mindegree/offline, axis=1))

# %% [code]
